# Supplementary material for: Transmission Dynamics of Low Pathogenicity Avian Influenza Infections in Turkey Flocks
Source: PubMed Central journal article supplement (PMC3202598; doi:10.1371/journal.pone.0026935), 2011-10-26
Supplement: pone.0026935.s001.pdf [file pone.0026935.s001.pdf]

**Table S1.** Raw data used to estimate the probability density distribution of  $R_0$ .

| flock ID | flock size | virus strain | first sampling |                                   |                        | second sampling |                                   |                        | third sampling |                                   |                        | fourth sampling |                                   |                        |
|----------|------------|--------------|----------------|-----------------------------------|------------------------|-----------------|-----------------------------------|------------------------|----------------|-----------------------------------|------------------------|-----------------|-----------------------------------|------------------------|
|          |            |              | day            | serology result (positive/tested) | virology result (pool) | day             | serology result (positive/tested) | virology result (pool) | day            | serology result (positive/tested) | virology result (pool) | day             | serology result (positive/tested) | virology result (pool) |
| 1        | 8900       | H7N3         | 92             | 0/10                              | not done               | 97              | not done                          | negative               | 125            | <b>10/10</b>                      | <b>negative</b>        |                 |                                   |                        |
| 2        | 13300      | H7N3         | 79             | 0/10                              | not done               | 103             | not done                          | negative               | 127            | <b>10/10</b>                      | <b>negative</b>        |                 |                                   |                        |
| 3        | 4300       | H7N3         | 133            | <b>5/10</b>                       | <b>negative</b>        |                 |                                   |                        |                |                                   |                        |                 |                                   |                        |
| 4        | 11000      | H7N3         | 58             | 0/10                              | negative               | 105             | <b>10/10</b>                      | <b>negative</b>        | 147            | 7/10                              | not done               |                 |                                   |                        |
| 5        | 8000       | H7N3         | 82             | 0/10                              | negative               | 124             | 0/10                              | positive               | 128            | 0/10                              | negative               | 135             | <b>9/10</b>                       | <b>negative</b>        |
| 6        | 6400       | H7N3         | 64             | 0/10                              | negative               | 92              | 0/10                              | negative               | 99             | <b>10/10</b>                      | <b>negative</b>        |                 |                                   |                        |
| 7        | 13000      | H7N3         | 73             | 0/10                              | not done               | 107             | <b>9/10</b>                       | <b>negative</b>        | 149            | not done                          | negative               |                 |                                   |                        |
| 8        | 11000      | H7N3         | 78             | 0/10                              | negative               | 112             | <b>9/10</b>                       | <b>negative</b>        | 154            | not done                          | negative               |                 |                                   |                        |
| 9        | 15000      | H7N3         | 101            | not done                          | positive               | 107             | 0/10                              | positive               | <b>109</b>     | <b>10/10</b>                      | not done               | <b>114</b>      | not done                          | <b>negative</b>        |
| 10       | 16800      | H7N3         | 89             | 0/10                              | negative               | 126             | 0/10                              | negative               | 131            | <b>9/10</b>                       | <b>negative</b>        |                 |                                   |                        |
| 11       | 10000      | H7N1         | 77             | 0/10                              | not done               | 96              | <b>10/10</b>                      | not done               | 99             | not done                          | <b>negative</b>        |                 |                                   |                        |
| 12       | 10900      | H7N3         | 34             | 0/10                              | not done               | 49              | not done                          | negative               | 83             | <b>10/10</b>                      | <b>negative</b>        |                 |                                   |                        |
| 13       | 6116       | H7N3         | 63             | 0/10                              | not done               | 106             | <b>9/10</b>                       | <b>negative</b>        |                |                                   |                        |                 |                                   |                        |
| 14       | 5200       | H7N3         | 66             | 0/10                              | negative               | 117             | <b>10/10</b>                      | <b>negative</b>        | 144            | not done                          | negative               |                 |                                   |                        |
| 15       | 5000       | H7N3         | 73             | 0/10                              | negative               | 109             | <b>8/8</b>                        | <b>negative</b>        | 116            | 9/10                              | negative               | 132             | not done                          | negative               |
| 16       | 6800       | H7N3         | 80             | 0/10                              | not done               | 84              | not done                          | negative               | 118            | <b>10/10</b>                      | <b>negative</b>        | 151             | not done                          | negative               |
| 17       | 16000      | H7N3         | 43             | 0/10                              | negative               | 79              | <b>10/10</b>                      | <b>negative</b>        |                |                                   |                        |                 |                                   |                        |
| 18       | 6580       | H7N1         | 87             | 0/10                              | positive               | 102             | <b>20/20</b>                      | <b>negative</b>        | 110            | not done                          | negative               |                 |                                   |                        |
| 19       | 12600      | H7N1         | 81             | <b>9/10</b>                       | <b>negative</b>        | 93              | 6/10                              | not done               |                |                                   |                        |                 |                                   |                        |
| 20       | 12600      | H7N1         | 81             | <b>8/10</b>                       | <b>negative</b>        | 93              | 6/10                              | not done               |                |                                   |                        |                 |                                   |                        |
| 21       | 12600      | H7N1         | 81             | <b>10/10</b>                      | <b>negative</b>        | 93              | 3/10                              | not done               |                |                                   |                        |                 |                                   |                        |
| 22       | 3600       | H7N3         | 56             | not done                          | negative               | 101             | <b>10/10</b>                      | <b>negative</b>        |                |                                   |                        |                 |                                   |                        |
| 23       | 25600      | H7N1         | 71             | <b>12/15</b>                      | <b>negative</b>        | 78              | 8/20                              | not done               |                |                                   |                        |                 |                                   |                        |
| 24       | 7600       | H7N3         | 55             | 0/10                              | not done               | 76              | 0/10                              | negative               | 98             | <b>10/10</b>                      | <b>negative</b>        | 111             | 10/10                             | not done               |
| 25       | 7500       | H7N1         | 51             | 0/10                              | not done               | 64              | <b>1/10</b>                       | <b>negative</b>        |                |                                   |                        |                 |                                   |                        |
| 26       | 7800       | H7N3         | 84             | 0/10                              | negative               | 102             | <b>10/10</b>                      | <b>negative</b>        |                |                                   |                        |                 |                                   |                        |
| 27       | 4000       | H7N1         | 81             | 0/10                              | not done               | 86              | 0/15                              | negative               | 106            | 0/10                              | not done               | 110             | <b>10/10</b>                      | <b>negative</b>        |
| 28       | 6400       | H7N1         | <b>87</b>      | <b>8/10</b>                       | not done               | <b>91</b>       | not done                          | <b>negative</b>        | 98             | 8/10                              | not done               |                 |                                   |                        |
| 29       | 12000      | H7N3         | 88             | 10/10                             | not done               | 92              | <b>10/10</b>                      | <b>negative</b>        | 112            | not done                          | negative               | 115             | not done                          | negative               |
| 30       | 17760      | H7N3         | 65             | 0/10                              | not done               | 131             | <b>9/10</b>                       | <b>negative</b>        | 145            | 7/10                              | negative               | 147             | not done                          | negative               |
| 31       | 17760      | H7N3         | 65             | 0/10                              | not done               | 131             | <b>7/10</b>                       | <b>negative</b>        |                |                                   |                        |                 |                                   |                        |
| 32       | 12000      | H7N3         | 42             | not done                          | negative               | 77              | 0/10                              | negative               | 106            | <b>10/10</b>                      | <b>negative</b>        |                 |                                   |                        |
| 33       | 12320      | H7N3         | 103            | 0/10                              | not done               | 125             | 0/10                              | negative               | 137            | not done                          | negative               | 152             | <b>10/10</b>                      | <b>negative</b>        |
| 34       | 16000      | H7N3         | 56             | not done                          | negative               | 84              | 0/10                              | negative               | 112            | <b>10/10</b>                      | <b>negative</b>        |                 |                                   |                        |
| 35       | 9800       | H7N3         | 71             | 0/10                              | negative               | 113             | 0/10                              | negative               | 136            | <b>2/10</b>                       | <b>negative</b>        | 137             | 10/10                             | negative               |
| 36       | 15300      | H7N3         | 91             | 0/10                              | not done               | 112             | 0/10                              | negative               | 140            | <b>9/10</b>                       | <b>negative</b>        |                 |                                   |                        |

**Legend:** **day** indicates the day of sampling, starting from the onset of the production cycle; the **shaded cells** corresponds to the data included in the analysis (i.e., earliest positive serological result associated to a negative virological result within  $\pm 5$  days).
